# Supplementary material
Source: publisher figshare collection journal article supplement (https://sage.figshare.com/ndownloader/files/23757632)
Supplement: Supplementary file 1 [file 23757632]

Supplementary Appendix

**A. All Identities and their block assignments**

All Identities, Arranged by Distance from Average Identity within Each Block[[1]](#footnote-1)

| blocks_4 | term | E | P | A | Distance from Average |
| --- | --- | --- | --- | --- | --- |
| 1 | computer_support_specialist | 1.33 | 0.82 | -0.02 | 0.0917376 |
| 1 | bricklayer | 1.21 | 0.69 | 0.11 | 0.0998218 |
| 1 | dental_hygienist | 1.68 | 0.86 | 0.34 | 0.1143948 |
| 1 | technician | 1.67 | 1.08 | 0.45 | 0.1572535 |
| 1 | machine_repairer | 1.36 | 1.02 | 0.68 | 0.1829599 |
| 1 | handyman | 1.76 | 1.04 | 0.46 | 0.2146710 |
| 1 | wage_earner | 1.76 | 1.13 | 0.09 | 0.2348916 |
| 1 | auto_mechanic | 1.15 | 0.58 | 0.55 | 0.2434472 |
| 1 | flight_attendant | 1.51 | 0.44 | 0.31 | 0.2599329 |
| 1 | computer_programmer | 1.51 | 1.46 | 0.01 | 0.3747805 |
| 1 | dietitian | 1.56 | 0.90 | -0.32 | 0.3819186 |
| 1 | craftsman | 1.59 | 1.07 | -0.31 | 0.4041646 |
| 1 | church_deacon | 1.41 | 1.40 | -0.17 | 0.4169900 |
| 1 | carpenter | 1.25 | 0.65 | 0.86 | 0.4427313 |
| 1 | dentist | 1.62 | 1.51 | 0.08 | 0.4461122 |
| 1 | security_guard | 1.38 | 1.49 | -0.11 | 0.4600948 |
| 1 | barber | 1.35 | 0.26 | 0.41 | 0.4625646 |
| 1 | baker | 1.97 | 0.70 | 0.06 | 0.4673630 |
| 1 | artist | 1.74 | 0.92 | -0.33 | 0.4986345 |
| 1 | shopkeeper | 1.15 | 0.25 | 0.22 | 0.4990138 |
| 1 | cosmetologist | 1.31 | 0.30 | 0.60 | 0.5050868 |
| 1 | landscape_architect | 1.59 | 1.14 | -0.39 | 0.5276059 |
| 1 | civil_engineer | 1.70 | 1.55 | -0.02 | 0.5897186 |
| 1 | electrical_engineer | 1.71 | 1.61 | 0.28 | 0.5954900 |
| 1 | blacksmith | 1.22 | 1.26 | 0.95 | 0.6033360 |
| 1 | landscaper | 1.29 | 0.15 | 0.28 | 0.6039091 |
| 1 | student_teacher | 1.80 | 0.32 | 0.47 | 0.6039837 |
| 1 | bus_driver | 1.31 | 0.17 | 0.05 | 0.6162313 |
| 1 | lecturer | 1.29 | 1.70 | 0.39 | 0.6226630 |
| 1 | biologist | 1.83 | 1.45 | -0.11 | 0.6397043 |
| 1 | forest_ranger | 2.01 | 0.96 | -0.22 | 0.6612837 |
| 1 | ophthalmologist | 1.60 | 1.43 | -0.34 | 0.6789027 |
| 1 | railroad_engineer | 1.17 | 1.05 | 1.07 | 0.7017646 |
| 1 | consultant | 1.53 | 1.61 | 0.77 | 0.7573646 |
| 1 | chiropractor | 1.77 | 1.38 | -0.36 | 0.7668868 |
| 1 | physicist | 1.60 | 1.41 | -0.43 | 0.7757360 |
| 1 | baby_sitter | 2.12 | 1.36 | 0.36 | 0.7817440 |
| 1 | automobile_assembler | 1.19 | 0.55 | 1.06 | 0.8026995 |
| 1 | speech.language_pathologist | 1.86 | 1.22 | -0.43 | 0.8211837 |
| 1 | cleaning_woman | 1.82 | 0.16 | -0.05 | 0.8963043 |
| 1 | dental_assistant | 1.40 | 0.00 | 0.05 | 0.9011646 |
| 1 | fire_investigator | 1.95 | 1.66 | 0.43 | 0.9212186 |
| 1 | roofer | 0.86 | 0.41 | 0.92 | 0.9425789 |
| 1 | coal_miner | 0.84 | 0.11 | 0.54 | 1.0064964 |
| 1 | steel_worker | 0.83 | 0.53 | 1.05 | 1.0519964 |
| 1 | photographer | 1.68 | 1.20 | -0.68 | 1.0701186 |
| 1 | ship_engineer | 1.62 | 1.93 | 0.38 | 1.0948075 |
| 1 | farm_laborer | 1.47 | -0.01 | -0.20 | 1.0997662 |
| 1 | dairy_farmer | 1.62 | 0.42 | -0.62 | 1.1032805 |
| 1 | assistant | 1.51 | -0.10 | 0.05 | 1.1175551 |
| 1 | chemical_engineer | 1.57 | 1.73 | -0.41 | 1.1481329 |
| 1 | cement_worker | 0.79 | 0.27 | 0.92 | 1.1805789 |
| 1 | laborer | 1.02 | -0.11 | 0.32 | 1.1859884 |
| 1 | engineer | 1.75 | 1.94 | 0.30 | 1.1880392 |
| 1 | pharmacist | 2.09 | 1.38 | -0.42 | 1.2120487 |
| 1 | journalist | 0.85 | 1.55 | 1.02 | 1.2215535 |
| 1 | manager_of_branch_store | 1.23 | 1.42 | 1.25 | 1.2358979 |
| 1 | music_director | 1.45 | 1.41 | 1.27 | 1.2585138 |
| 1 | receptionist | 1.27 | -0.16 | -0.04 | 1.2746265 |
| 1 | machine_operator_in_a_factory | 0.94 | 0.29 | 1.10 | 1.2761027 |
| 1 | farmer | 2.13 | 0.50 | -0.48 | 1.3298011 |
| 1 | sheet_metal_worker | 0.91 | 0.31 | 1.15 | 1.3632376 |
| 1 | investigator | 1.67 | 2.01 | -0.04 | 1.3692360 |
| 1 | merchant | 0.70 | 0.51 | 1.14 | 1.3717821 |
| 1 | construction_contractor | 1.37 | 1.38 | 1.35 | 1.3892535 |
| 1 | miner | 0.94 | -0.13 | 0.59 | 1.3916408 |
| 1 | self.employed_worker | 1.87 | 1.81 | 0.85 | 1.3925424 |
| 1 | education_administrator | 1.43 | 2.09 | 0.56 | 1.4528932 |
| 1 | scientist | 1.89 | 1.84 | -0.35 | 1.4991424 |
| 1 | fisherman | 1.47 | 0.41 | -0.87 | 1.5611202 |
| 1 | chaplain | 2.12 | 1.58 | -0.52 | 1.6259503 |
| 1 | public_relations_specialist | 1.50 | 1.74 | 1.24 | 1.6404424 |
| 1 | instructor | 1.74 | 2.11 | 0.56 | 1.6413503 |
| 1 | psychologist | 1.61 | 1.44 | -0.89 | 1.6600757 |
| 1 | philosopher | 1.47 | 0.89 | -1.03 | 1.6862503 |
| 1 | construction_foreman | 1.13 | 1.47 | 1.42 | 1.6877948 |
| 1 | shop_clerk | 1.27 | -0.38 | 0.10 | 1.7347186 |
| 1 | researcher | 1.93 | 1.80 | -0.56 | 1.7733472 |
| 1 | construction_laborer | 1.33 | 0.68 | 1.59 | 1.8207487 |
| 1 | ambassador | 1.46 | 2.28 | 0.31 | 1.8514281 |
| 1 | professional | 1.72 | 2.23 | 0.09 | 1.8673392 |
| 1 | negotiator | 1.90 | 2.17 | 0.43 | 1.8751805 |
| 1 | salesclerk | 0.77 | -0.01 | 1.08 | 1.8841059 |
| 1 | lobby_attendant | 1.29 | -0.40 | -0.13 | 1.9121646 |
| 1 | tutor | 2.39 | 1.66 | -0.31 | 1.9374408 |
| 1 | diplomat | 1.20 | 2.21 | 0.80 | 1.9664741 |
| 1 | professor | 1.83 | 2.27 | 0.24 | 2.0359440 |
| 1 | anesthetist | 1.52 | 1.85 | -0.89 | 2.2137995 |
| 1 | detective | 1.65 | 1.93 | -0.80 | 2.2281852 |
| 1 | telephone_operator | 0.40 | -0.18 | 0.57 | 2.2287297 |
| 1 | airline_pilot | 1.66 | 2.41 | 0.33 | 2.3043868 |
| 1 | sewing_machine_operator | 1.03 | -0.53 | -0.07 | 2.3321265 |
| 1 | psychiatrist | 1.68 | 1.71 | -1.02 | 2.3686487 |
| 1 | chairwoman | 1.40 | 2.33 | 0.91 | 2.3969424 |
| 1 | actor | 0.82 | 1.36 | 1.68 | 2.4857154 |
| 1 | principal | 1.57 | 2.42 | 0.74 | 2.5106456 |
| 1 | magician | 1.13 | 0.78 | 1.83 | 2.5271773 |
| 1 | part.time_employee | 0.93 | -0.61 | -0.03 | 2.6215011 |
| 1 | night_watchman | 1.56 | 1.18 | -1.33 | 2.6449646 |
| 1 | commentator | 0.89 | 0.92 | 1.86 | 2.7678678 |
| 1 | typist | 0.61 | -0.38 | 1.04 | 2.8618646 |
| 1 | textile_worker | 0.82 | -0.68 | 0.20 | 2.8652265 |
| 1 | sheriff | 1.07 | 2.42 | 1.07 | 2.9711551 |
| 1 | parking_attendant | 0.29 | -0.29 | -0.40 | 3.0519979 |
| 1 | chauffeur | 1.51 | -0.51 | -0.73 | 3.0663265 |
| 1 | bodyguard | 1.86 | 2.65 | 0.39 | 3.2481011 |
| 1 | cashier | 0.65 | -0.73 | 0.42 | 3.2601821 |
| 1 | restaurant_operator | 1.33 | 1.65 | 1.92 | 3.2728011 |
| 1 | writer | 1.55 | 2.03 | -1.18 | 3.3431694 |
| 1 | housekeeper | 1.40 | -0.74 | -0.53 | 3.4000376 |
| 1 | attorney | 1.21 | 2.46 | 1.51 | 3.9353043 |
| 1 | migrant_worker | 0.79 | -0.97 | 0.10 | 3.9354233 |
| 1 | reporter | 0.66 | 1.46 | 2.08 | 4.0737757 |
| 1 | newscaster | 0.84 | 1.60 | 2.10 | 4.0980297 |
| 1 | lobbyist | 0.01 | 1.53 | 1.67 | 4.1604884 |
| 1 | labor_union_leader | 0.85 | 2.14 | 1.92 | 4.4805630 |
| 1 | custodian | 1.54 | -0.82 | -0.93 | 4.4988916 |
| 1 | janitor | 1.45 | -0.87 | -0.94 | 4.6749027 |
| 1 | maid | 1.47 | -1.00 | -0.73 | 4.7011456 |
| 1 | gas_station_attendant | 0.74 | -1.05 | -0.44 | 4.7718900 |
| 1 | lawyer | 0.83 | 2.63 | 1.75 | 5.3985519 |
| 1 | temporary_worker | 0.53 | -1.28 | -0.28 | 5.8366360 |
| 1 | library_assistant | 1.78 | -0.06 | -2.02 | 6.3602456 |
| 1 | librarian | 1.83 | -0.28 | -2.06 | 7.0706900 |
| 1 | politician | -0.85 | 2.08 | 1.44 | 7.5915725 |
| 1 | chambermaid | 0.50 | -1.52 | -0.84 | 7.9246487 |
| 2 | decorator | 1.70 | 0.81 | 0.84 | 0.0747173 |
| 2 | travel_agent | 1.43 | 0.54 | 0.98 | 0.3525973 |
| 2 | environmentalist | 2.10 | 0.65 | 0.77 | 0.3959845 |
| 2 | musician | 1.77 | 1.25 | 1.47 | 0.4315173 |
| 2 | hairstylist | 1.62 | 0.39 | 0.71 | 0.4926682 |
| 2 | hostess | 1.94 | 0.39 | 0.92 | 0.5649209 |
| 2 | host | 2.08 | 1.62 | 1.26 | 0.6525991 |
| 2 | organizer | 2.07 | 1.68 | 0.48 | 0.6792154 |
| 2 | nursing_assistant | 2.32 | 0.94 | 0.38 | 0.6939809 |
| 2 | chef | 1.69 | 1.35 | 1.68 | 0.7675154 |
| 2 | storyteller | 2.15 | 1.62 | 0.30 | 0.8499936 |
| 2 | nutritionist | 2.30 | 1.20 | 0.16 | 0.9179736 |
| 2 | social_worker | 2.12 | 1.27 | -0.10 | 1.1622809 |
| 2 | interpreter | 2.26 | 1.97 | 0.80 | 1.1767827 |
| 2 | hairdresser | 1.56 | -0.01 | 1.01 | 1.2162609 |
| 2 | beautician | 1.32 | 0.05 | 1.11 | 1.2300791 |
| 2 | cook | 2.24 | 1.69 | 1.58 | 1.2639318 |
| 2 | missionary | 2.12 | 1.41 | -0.14 | 1.3132263 |
| 2 | server | 1.77 | -0.07 | 0.71 | 1.3518663 |
| 2 | choreographer | 1.27 | 1.21 | 1.97 | 1.4158736 |
| 2 | astronaut | 2.33 | 2.13 | 0.76 | 1.5844100 |
| 2 | pastor | 1.89 | 2.31 | 0.72 | 1.5952245 |
| 2 | skilled_worker | 2.38 | 2.07 | 0.52 | 1.6328191 |
| 2 | waiter | 1.31 | -0.16 | 1.27 | 1.8216536 |
| 2 | bartender | 1.33 | 1.18 | 2.16 | 1.8296736 |
| 2 | waitress | 1.50 | -0.21 | 1.30 | 1.8828700 |
| 2 | philanthropist | 2.56 | 1.98 | 0.28 | 1.9745627 |
| 2 | entrepreneur | 1.59 | 2.00 | 1.99 | 2.1567082 |
| 2 | teacher | 2.50 | 2.31 | 0.32 | 2.5289500 |
| 2 | ship_captain | 1.89 | 2.54 | 1.47 | 2.5846936 |
| 2 | police_officer | 1.05 | 2.49 | 1.43 | 2.6869936 |
| 2 | garbage_collector | 1.25 | -0.49 | 0.42 | 2.7972318 |
| 2 | mail_carrier | 1.93 | 0.02 | -0.44 | 2.8601173 |
| 2 | physician | 2.41 | 2.35 | -0.04 | 2.9935082 |
| 2 | educator | 2.42 | 2.52 | 0.26 | 3.0272827 |
| 2 | secretary | 1.59 | -0.22 | -0.31 | 3.0291227 |
| 2 | veterinarian | 2.80 | 2.01 | -0.09 | 3.0839845 |
| 2 | radio_and_television_announcer | 0.76 | 1.24 | 2.44 | 3.3424754 |
| 2 | taxi_driver | 0.75 | -0.34 | 1.67 | 3.4856682 |
| 2 | coach | 1.96 | 2.37 | 2.19 | 3.5688718 |
| 2 | civil_servant | 1.18 | -0.17 | -0.54 | 3.7009645 |
| 2 | scholar | 2.48 | 2.24 | -0.45 | 3.7343827 |
| 2 | counselor | 2.54 | 1.66 | -0.78 | 3.7921700 |
| 2 | bellhop | 1.20 | -0.82 | 0.95 | 3.8094227 |
| 2 | president | 1.29 | 2.98 | 1.13 | 3.8242936 |
| 2 | priest | 1.89 | 2.13 | -0.91 | 4.2599318 |
| 2 | salesperson | 0.15 | 0.39 | 2.14 | 4.3759954 |
| 2 | athlete | 1.81 | 2.50 | 2.45 | 4.6149700 |
| 2 | assembly_line_worker | 0.77 | -1.02 | 0.76 | 5.1737027 |
| 2 | fast_food_server | 0.67 | -1.05 | 0.90 | 5.4802863 |
| 2 | auctioneer | 0.76 | 1.19 | 3.03 | 5.5547554 |
| 2 | CEO | 0.71 | 3.22 | 1.48 | 5.8628518 |
| 2 | busboy | 0.85 | -1.16 | 0.33 | 5.9080754 |
| 2 | intern | 1.41 | -1.39 | 0.05 | 6.7821718 |
| 2 | pornographer | -1.26 | 0.51 | 0.92 | 8.7668700 |
| 3 | foreman | 0.64 | 1.30 | 0.34 | 0.0179239 |
| 3 | crane_operator | 0.94 | 1.23 | 0.29 | 0.0411404 |
| 3 | patrolman | 1.01 | 1.24 | 0.33 | 0.0768689 |
| 3 | bailiff | 0.72 | 1.56 | 0.10 | 0.1108120 |
| 3 | customs_officer | 0.45 | 1.37 | 0.13 | 0.1131395 |
| 3 | wholesaler | 0.80 | 1.08 | 0.54 | 0.1171900 |
| 3 | online_merchant | 0.80 | 0.86 | 0.25 | 0.1708331 |
| 3 | political_scientist | 0.81 | 0.86 | 0.30 | 0.1735230 |
| 3 | bailsman | 0.58 | 1.57 | 0.55 | 0.2009129 |
| 3 | editor | 1.08 | 1.70 | 0.23 | 0.2998863 |
| 3 | logger | 0.70 | 1.18 | 0.83 | 0.3342129 |
| 3 | cabinet_member | 0.59 | 1.84 | 0.46 | 0.3890276 |
| 3 | insurance_agent | 0.52 | 0.68 | 0.24 | 0.3974762 |
| 3 | economist | 0.87 | 0.93 | -0.26 | 0.4020542 |
| 3 | butcher | 0.75 | 0.77 | 0.67 | 0.4170367 |
| 3 | bank_manager | 1.11 | 1.81 | 0.27 | 0.4270184 |
| 3 | cabinet_maker | 1.10 | 0.71 | 0.28 | 0.4404588 |
| 3 | auditor_general | 0.14 | 1.55 | 0.10 | 0.4684221 |
| 3 | electrical_linesman | 1.01 | 0.64 | 0.34 | 0.4734789 |
| 3 | city_councilor | 0.66 | 1.80 | 0.70 | 0.4817991 |
| 3 | interviewer | 0.57 | 1.71 | 0.78 | 0.4941716 |
| 3 | systems_engineer | 1.36 | 1.41 | -0.06 | 0.5029285 |
| 3 | commissioner | 0.99 | 1.88 | 0.59 | 0.5424982 |
| 3 | insurance_claims_investigator | 0.07 | 1.22 | -0.06 | 0.5583340 |
| 3 | railroad_conductor | 1.05 | 1.18 | 0.94 | 0.5638643 |
| 3 | truck_driver | 0.61 | 0.55 | 0.51 | 0.5973597 |
| 3 | CPA | 0.88 | 1.48 | -0.50 | 0.6414175 |
| 3 | accountant | 1.03 | 1.16 | -0.48 | 0.6424661 |
| 3 | locksmith | 1.16 | 0.81 | -0.27 | 0.6660248 |
| 3 | advertising_copy_writer | 0.65 | 0.55 | 0.66 | 0.6856652 |
| 3 | immigration_officer | 0.14 | 1.63 | 0.72 | 0.7051707 |
| 3 | psychoanalyst | 0.82 | 1.22 | -0.58 | 0.7146945 |
| 3 | building_contractor | 1.05 | 1.39 | 1.04 | 0.7163808 |
| 3 | supervisor | 0.76 | 1.99 | 0.73 | 0.7402083 |
| 3 | switchboard_operator | 0.79 | 0.54 | 0.74 | 0.7639780 |
| 3 | retailer | 0.54 | 0.79 | 1.01 | 0.8328028 |
| 3 | mayor | 1.03 | 2.02 | 0.75 | 0.8855001 |
| 3 | tax_preparer | 0.69 | 1.31 | -0.70 | 0.9269716 |
| 3 | deputy | 1.08 | 2.00 | 0.80 | 0.9385037 |
| 3 | real_estate_agent | 0.79 | 1.04 | 1.21 | 0.9563808 |
| 3 | inspector | 0.57 | 1.54 | -0.67 | 0.9690523 |
| 3 | rancher | 1.06 | 0.38 | -0.05 | 0.9875340 |
| 3 | welder | 0.92 | 0.51 | 0.88 | 0.9915707 |
| 3 | mechanical_engineer | 1.63 | 1.69 | -0.06 | 1.0661056 |
| 3 | architect | 1.52 | 1.70 | -0.28 | 1.0810285 |
| 3 | electrician | 1.26 | 0.43 | -0.11 | 1.1086780 |
| 3 | clergy | 1.08 | 1.44 | -0.73 | 1.1235854 |
| 3 | motel_owner | 0.31 | 0.31 | 0.11 | 1.1305010 |
| 3 | governor | 0.57 | 2.20 | 0.76 | 1.1458092 |
| 3 | optical_engineer | 1.56 | 1.25 | -0.45 | 1.1722670 |
| 3 | jeweler | 0.85 | 0.65 | -0.64 | 1.2057202 |
| 3 | bouncer | 0.55 | 2.30 | 0.63 | 1.2363037 |
| 3 | usher | 1.61 | 0.83 | -0.29 | 1.2472826 |
| 3 | probation_officer | 0.12 | 2.09 | 0.73 | 1.2824652 |
| 3 | broadcast_news_analyst | 0.68 | 1.33 | 1.41 | 1.3291294 |
| 3 | tool_and_die_maker | 0.80 | 0.19 | -0.15 | 1.3365166 |
| 3 | bulldozer_operator | 0.44 | 1.17 | 1.38 | 1.3551634 |
| 3 | statistician | 0.91 | 0.63 | -0.70 | 1.3589606 |
| 3 | bank_teller | 1.27 | 0.57 | -0.52 | 1.3755955 |
| 3 | computer_security_specialist | 1.57 | 1.45 | -0.59 | 1.4395248 |
| 3 | legislator | -0.07 | 2.18 | 0.31 | 1.4932028 |
| 3 | plumber | 1.51 | 0.39 | -0.11 | 1.4983138 |
| 3 | senator | 0.00 | 2.12 | 0.81 | 1.5781065 |
| 3 | customer_systems_analyst | 0.90 | 0.33 | -0.60 | 1.6471927 |
| 3 | creditor | -0.45 | 1.63 | 0.63 | 1.6904423 |
| 3 | transportation_ticket_agent | 0.40 | 0.01 | 0.26 | 1.7035450 |
| 3 | web_developer | 1.21 | 1.22 | -0.96 | 1.7098386 |
| 3 | state_trooper | 0.33 | 2.23 | 1.08 | 1.7654010 |
| 3 | coroner | 0.64 | 0.69 | -0.95 | 1.8114120 |
| 3 | attorney_general | 0.94 | 2.54 | 0.73 | 1.8739597 |
| 3 | stenographer | 0.74 | 0.06 | -0.40 | 1.8985404 |
| 3 | divorce_lawyer | -0.33 | 1.96 | 0.81 | 1.9308909 |
| 3 | tv_repairman | 0.96 | -0.04 | -0.21 | 1.9825065 |
| 3 | auditor | -0.33 | 1.54 | -0.61 | 1.9827771 |
| 3 | judge | 1.15 | 2.53 | -0.22 | 1.9857679 |
| 3 | telephone_installer | 0.93 | -0.11 | 0.04 | 1.9858670 |
| 3 | defense_attorney | 0.86 | 2.05 | 1.44 | 2.0145028 |
| 3 | referee | 0.71 | 2.06 | 1.45 | 2.0413716 |
| 3 | district_attorney | 0.80 | 2.38 | 1.16 | 2.0461294 |
| 3 | bookie | -0.62 | 0.85 | 0.08 | 2.0666936 |
| 3 | stockbroker | 0.27 | 1.82 | 1.51 | 2.0885900 |
| 3 | warden | -0.18 | 2.25 | 0.84 | 2.1500257 |
| 3 | policeman | 0.91 | 2.29 | 1.30 | 2.1503624 |
| 3 | chief_operations_officer | 0.83 | 2.45 | 1.15 | 2.1929487 |
| 3 | shoe_repairman | 1.49 | 0.15 | -0.45 | 2.3152019 |
| 3 | private_eye | 0.35 | 1.47 | -1.21 | 2.3571578 |
| 3 | tailor | 1.25 | 0.09 | -0.60 | 2.3878927 |
| 3 | chemist | 1.82 | 1.88 | -0.68 | 2.4169331 |
| 3 | pawnbroker | -0.39 | 0.42 | 0.95 | 2.4808872 |
| 3 | clerical_worker | 1.11 | -0.09 | -0.47 | 2.5157083 |
| 3 | board_director | 1.04 | 2.59 | 1.09 | 2.5205606 |
| 3 | film_star | 0.48 | 1.77 | 1.76 | 2.5686386 |
| 3 | geologist | 1.34 | 0.49 | -1.01 | 2.5774780 |
| 3 | interrogator | -0.40 | 2.05 | 1.09 | 2.6046156 |
| 3 | advertising_executive | 0.13 | 2.13 | 1.51 | 2.6782441 |
| 3 | author | 1.45 | 1.88 | -1.13 | 2.8059221 |
| 3 | casual_laborer | 0.77 | -0.42 | -0.05 | 2.9507221 |
| 3 | watchman | 1.50 | 1.40 | -1.28 | 2.9628340 |
| 3 | clerk | 0.98 | -0.40 | -0.09 | 2.9653395 |
| 3 | manager | 1.15 | 2.61 | 1.29 | 3.0230001 |
| 3 | funeral_director | 0.80 | 0.57 | -1.36 | 3.1180845 |
| 3 | ticket_taker | 0.36 | -0.47 | 0.09 | 3.2009533 |
| 3 | prosecutor | 0.15 | 2.53 | 1.46 | 3.3802487 |
| 3 | prosecuting_attorney | 0.17 | 2.28 | 1.77 | 3.6288689 |
| 3 | executive | 0.82 | 2.73 | 1.50 | 3.6761028 |
| 3 | chairman_of_the_board | 1.05 | 3.04 | 0.96 | 3.7189762 |
| 3 | bill_collector | -1.07 | 1.63 | 1.02 | 3.9947661 |
| 3 | bookkeeper | 1.35 | 0.04 | -1.44 | 4.7708478 |
| 3 | file_clerk | 0.58 | -0.67 | -1.05 | 5.5046927 |
| 4 | fundraiser | 2.55 | 2.18 | 1.40 | 0.9562544 |
| 4 | elementary_school_teacher | 2.66 | 1.81 | 0.71 | 1.2295083 |
| 4 | nurse | 2.84 | 1.75 | 0.53 | 1.7863083 |
| 4 | comedian | 1.94 | 1.19 | 2.88 | 2.1426391 |
| 4 | medic | 2.78 | 2.62 | 1.86 | 2.3228929 |
| 4 | pediatrician | 3.01 | 2.52 | 0.53 | 3.1984160 |
| 4 | doctor | 2.69 | 2.94 | 0.37 | 3.9942929 |
| 4 | street_musician | 1.23 | -0.45 | 1.71 | 4.1159160 |
| 4 | cheerleader | 1.05 | 0.24 | 2.93 | 4.4085083 |
| 4 | firefighter | 3.27 | 2.85 | 2.29 | 4.5584083 |
| 4 | surgeon | 2.92 | 3.05 | -0.33 | 6.7337852 |
| 4 | street_preacher | -0.36 | -0.40 | 2.06 | 8.9298160 |
| 4 | telemarketer | -1.76 | -1.55 | 1.76 | 22.5205467 |

1. Distance calculated by the sum of squared differences between the average E, P, A values of the block and the identity’s E, P, and A values [↑](#footnote-ref-1)
